# Supplementary material for: Class 3 semaphorins expression and association with innervation and angiogenesis within the degenerate human intervertebral disc
Source: PubMed Central journal article supplement (PMC4621894; doi:10.18632/oncotarget.4274), 2015-06-15
Supplement: oncotarget-06-18338-s001.pdf [file oncotarget-06-18338-s001.pdf]

SUPPLEMENTARY FIGURES AND TABLES

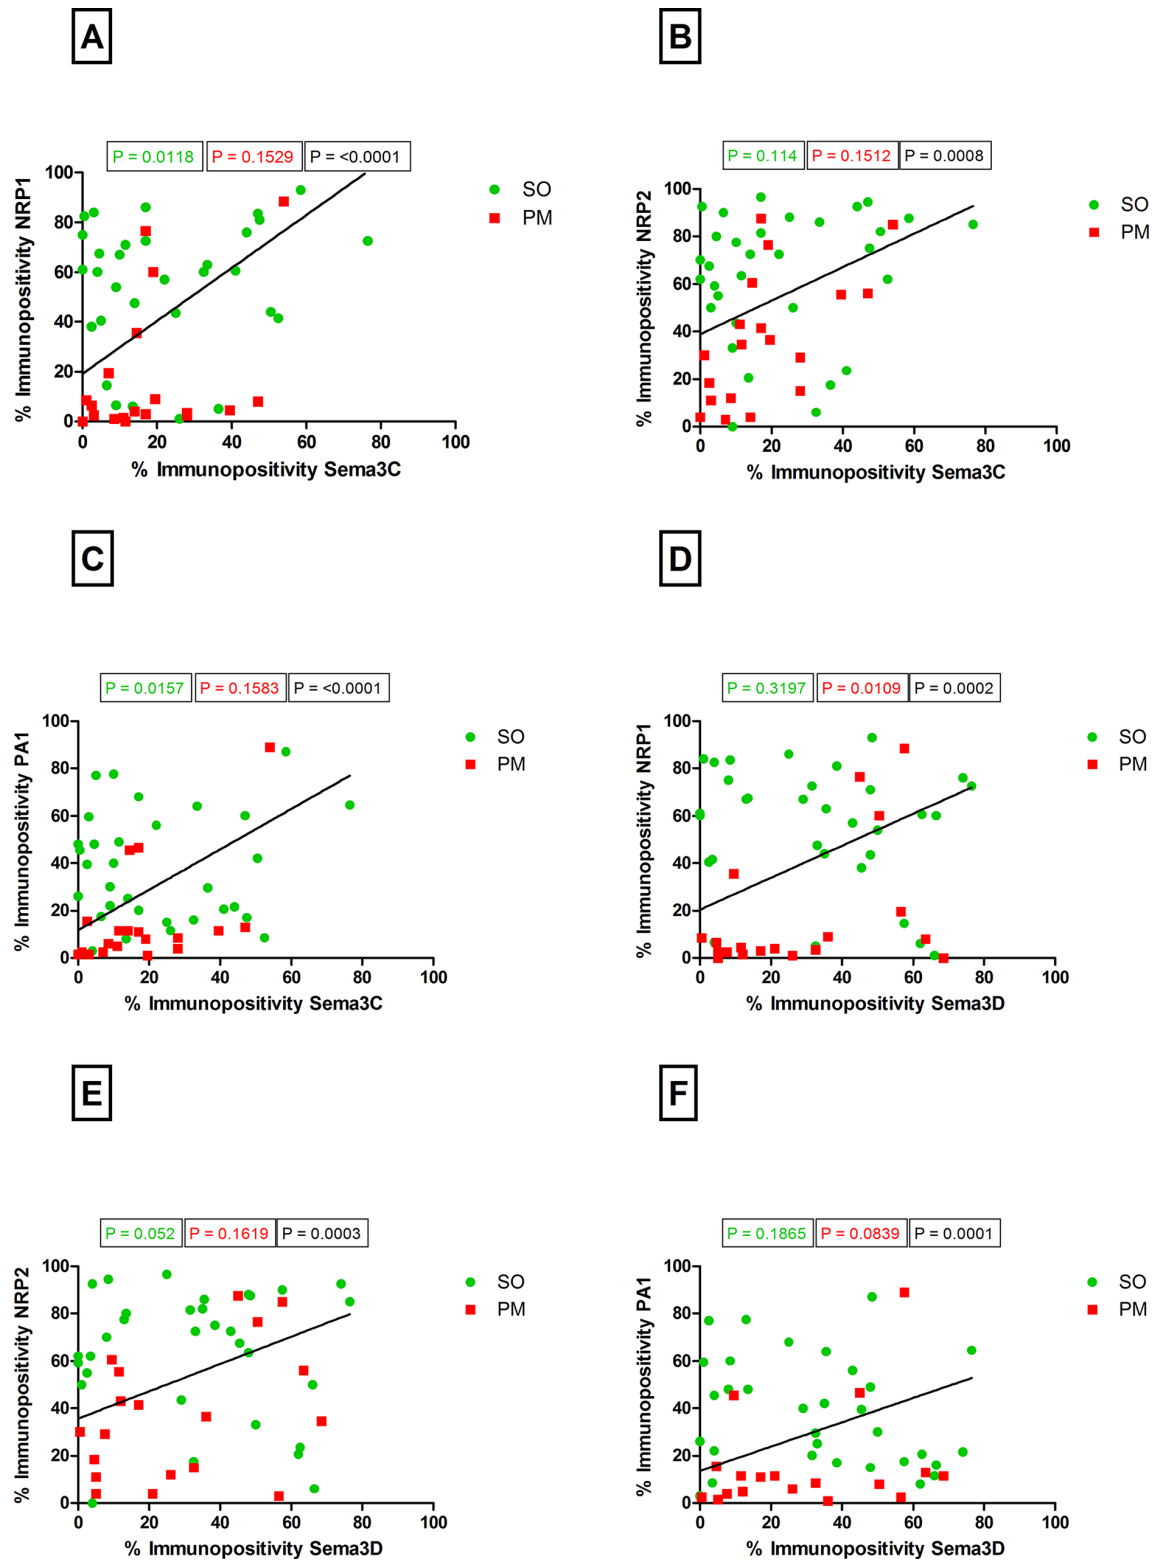

**Supplementary Figure 1: Correlation of immunopositivity of sema3C against its receptors NRP1 A, NRP2 B, and PA1 C, demonstrated significant strong positive correlations in PM and surgical NP tissues. Strong positive correlations were evident between immunopositivity of sema3D against NRP1 D, NRP2 E, and PA1 F.**

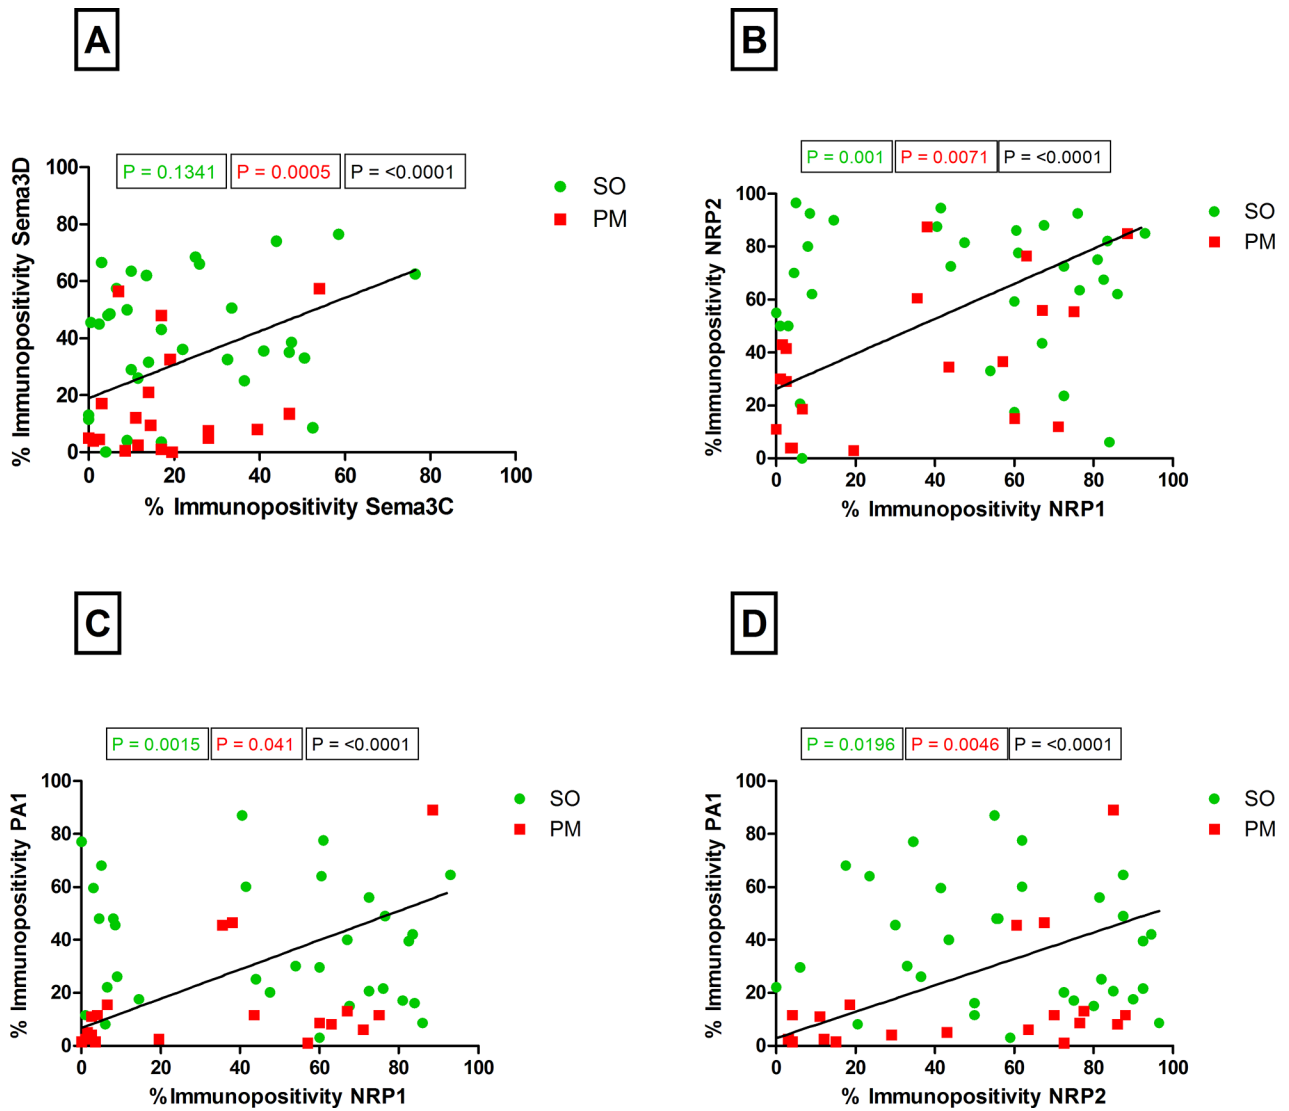

**Supplementary Figure 2: Correlation of immunopositivity of sema3C against sema3D A. NRP1 against NRP2 B. NRP1 against PA1 C. and NRP2 against PA1 D. All correlations demonstrated significant strong positive correlations in PM and surgical NP tissues.**

**Supplementary Table 1: Patient details of human IVD samples used in this study.** Samples marked PM (SHU) were processed at Sheffield Hallam University, and samples marked PM (UT) were processed in Utrecht. Non-degenerate (ND) grade < 4; Mildly-Degenerate (MD) grade 4–7; Severely-Degenerate (SD) grade > 7; Infiltrated cohort (I). Sample cohorts used for immunohistochemistry (IHC): ND-/- Non-degenerate, no nerves and no blood vessels; D-/- Degenerate no nerves, no blood vessels; D+/- Degenerate with nerves, no blood vessels; D+/+ Degenerate with nerves and blood vessels

| Reference | Source | Age      | IVD Level | IVD Intact? | Average Grade | Classification | DE | Cytokine Treatments | IHC | Cohort |        |
|-----------|--------|----------|-----------|-------------|---------------|----------------|----|---------------------|-----|--------|--------|
| HD        | 1      | Surgical | 42        | L4/L5       | No            | 2.5            | I  | ✓                   |     | ✓      | ND -/- |
| HD        | 2      | Surgical | 40        | L5/S1       | Yes           | 7.0            | I  | ✓                   |     |        |        |
| HD        | 3      | Surgical | 25        | L4/L5       | Yes           | 4.0            | MD | ✓                   |     |        |        |
| HD        | 5      | Surgical | 33        | L5/S1       | Yes           | 8.5            | SD | ✓                   |     | ✓      | D-/-   |
| HD        | 9      | Surgical | 32        | L5/S1       | Yes           | 2.0            | ND | ✓                   |     | ✓      | D-/-   |
| HD        | 17     | Surgical | 45        | L5/S1       | Yes           | 4.0            | ND | ✓                   |     |        |        |
| HD        | 21     | Surgical | 26        | L4/L5       | Yes           | 4.0            | I  | ✓                   |     |        |        |
| HD        | 25     | Surgical | 20        | L4/L5       | No            | 3.0            | I  | ✓                   |     |        |        |
| HD        | 26     | Surgical | 40        | L5/S1       | No            | 5.0            | I  | ✓                   |     |        |        |
| HD        | 30     | PM       | 45        | L4/L5       | Yes           | 2.0            | ND | ✓                   |     |        |        |
| HD        | 31     | PM       | 45        | L3/L4       | Yes           | 3.0            | ND | ✓                   |     |        |        |
| HD        | 33     | Surgical | 48        | L4/L5       | No            | 10.0           | SD | ✓                   |     |        |        |
| HD        | 34     | Surgical | 26        | L5/S1       | No            | 11.0           | SD | ✓                   |     |        |        |
| HD        | 36     | Surgical | 33        | L5/S1       | Yes           | 9.0            | I  | ✓                   |     |        |        |
| HD        | 38     | PM (SHU) | 74        |             | Yes           | 7.5            |    |                     |     | ✓      | D+/-   |
| HD        | 39     | PM (SHU) | 74        |             | Yes           | 11.5           |    |                     |     | ✓      | D+/+   |
| HD        | 44     | Surgical | 42        | L5/S1       | Yes           | 3.0            | ND | ✓                   |     |        |        |
| HD        | 45     | Surgical | 36        | L5/S1       | Yes           | 8.0            | SD | ✓                   |     |        |        |
| HD        | 53     | Surgical | 38        | L5/S1       | No            | 7.0            | MD | ✓                   |     | ✓      | D+/+   |
| HD        | 54     | Surgical | 28        | L4/L5       | Yes           | 9.0            | SD | ✓                   | ✓   |        |        |
| HD        | 56     | Surgical | 43        | L5/S1       | No            | 7.0            | MD | ✓                   |     |        |        |
| HD        | 57     | Surgical | 44        | L5/S1       | Yes           | 7.0            | MD | ✓                   |     |        |        |
| HD        | 58     | Surgical | 28        | L5/S1       | No            | 8.0            | SD | ✓                   |     |        |        |
| HD        | 59     | Surgical | 35        | L5/S1       | Yes           | 8.0            | SD | ✓                   |     |        |        |
| HD        | 60     | Surgical |           |             |               | 5.0            | MD |                     |     | ✓      | D+/+   |
| HD        | 61     | Surgical | 43        | L5/S1       | No            | 4.0            | MD | ✓                   |     |        |        |
| HD        | 63     | Surgical | 42        | L5/S1       | No            | 9.0            | SD | ✓                   |     | ✓      | D-/-   |
| HD        | 65     | Surgical | 43        | L4/L5       | No            | 10.0           | SD | ✓                   |     |        |        |
| HD        | 66     | Surgical | 62        | L3/L4       | Yes           | 9.0            | I  | ✓                   |     | ✓      | D-/-   |
| HD        | 67     | Surgical | 39        | L4/L5       | Yes           | 5.0            | MD |                     |     | ✓      | D-/-   |

(Continued)

| Reference | Source | Age      | IVD Level | IVD Intact? | Average Grade | Classification | DE | Cytokine Treatments | IHC | Cohort |
|-----------|--------|----------|-----------|-------------|---------------|----------------|----|---------------------|-----|--------|
| HD        | 74     | Surgical |           | L4/L5       | No            | 7.5            | SD |                     | ✓   | D-/-   |
| HD        | 75     | Surgical | 40        | L3/L4       | Yes           | 7.0            | MD | ✓                   |     |        |
| HD        | 78     | Surgical | 55        | C3/C4       | Yes           | 10.0           | SD |                     | ✓   | D-/-   |
| HD        | 79     | Surgical | 45        | L4/L5       | No            | 3.0            | ND | ✓                   | ✓   |        |
| HD        | 84     | Surgical | 38        | C6/C7       | Yes           | 5.0            | MD |                     | ✓   | D+/-   |
| HD        | 85     | Surgical | 49        | L2/L3       | No            | 7.0            | I  | ✓                   | ✓   | D+/+   |
| HD        | 86     | Surgical | 40        | L5/S1       | No            | 3.0            | I  | ✓                   |     |        |
| HD        | 89     | Surgical | 21        | L5/S1       | No            | 4              | MD | ✓                   | ✓   |        |
| HD        | 90     | Surgical |           |             |               | 11.0           | SD |                     | ✓   |        |
| HD        | 92     | Surgical | 38        | L5/S1       |               | 3.5            | ND | ✓                   | ✓   | D+/-   |
| HD        | 93     | Surgical | 38        | L5/S1       |               | 7.0            | MD | ✓                   |     |        |
| HD        | 94     | Surgical | 66        | L5/S1       | Yes           | 6.0            | MD | ✓                   |     |        |
| HD        | 95     | Surgical | 39        | L5/S1       | Yes           | 6.0            | MD |                     | ✓   | D+/+   |
| HD        | 96     | Surgical | 54        | C5/C6       | No            | 9.0            | SD |                     | ✓   | D+/-   |
| HD        | 97     | Surgical | 46        | L5/S1       | No            | 6.0            | MD | ✓                   |     |        |
| HD        | 98     | Surgical | 65        | L3/L4       | Yes           | 6.0            | MD | ✓                   |     |        |
| HD        | 106    | Surgical | 52        | L4/L5       | Yes           | 5.0            | MD |                     | ✓   | D+/-   |
| HD        | 110    | Surgical | 24        | L3          | No            | 3.0            | ND |                     | ✓   | ND-/-  |
| HD        | 111    | Surgical | 68        | L4/L5       | No            | 8.0            | SD |                     | ✓   | D-/-   |
| HD        | 112    | Surgical | 42        | L5/S1       | No            | 11.0           | SD |                     | ✓   | D-/-   |
| HD        | 124    | Surgical | 40        | L4/L5       | No            | 3.5            | ND |                     | ✓   | ND-/-  |
| HD        | 127    | Surgical | 27        | L5/S1       | No            |                |    | ✓                   |     |        |
| HD        | 145    | Surgical | 38        | L4/L5       | No            | 8.15           | SD | ✓                   |     |        |
| HD        | 146    | Surgical | 47        | L5/S1       |               | 5.85           | MD | ✓                   |     |        |
| HD        | 148    | Surgical | 70        | C5/C6       |               | 6.0            |    | ✓                   |     |        |
| HD        | 151    | Surgical | 47        | L5/S1       |               | 5.3            | MD | ✓                   |     |        |
| HD        | 153    | Surgical | 30        | L5/S1       | No            | 6.0            | MD | ✓                   |     |        |
| HD        | 154    | Surgical | 52        | L4/L5       | No            | 6.0            | MD | ✓                   |     |        |
| HD        | 156    | Surgical | 24        | L4/L5       | Yes           | 3.0            | ND | ✓                   |     |        |
| HD        | 157    | Surgical | 31        | L5/S1       | No            | 5.0            | I  | ✓                   | ✓   | D+/+   |
| HD        | 158    | Surgical | 38        | L4/L5       | No            | 7.0            | I  | ✓                   | ✓   |        |
| HD        | 159    | Surgical | 39        | L4/L5       | No            | 3.0            | I  | ✓                   |     |        |
| HD        | 160    | Surgical | 26        | C3/C5       |               | 6.0            | MD | ✓                   |     |        |
| HD        | 166    | Surgical | 33        | L4/L5       | Yes           | 8.0            | SD | ✓                   |     |        |
| HD        | 170    | Surgical |           | L5/S1       | No            | 8.0            | SD | ✓                   | ✓   |        |

(Continued)

| Reference | Source    | Age      | IVD Level | IVD Intact? | Average Grade | Classification | DE | Cytokine Treatments | IHC | Cohort |
|-----------|-----------|----------|-----------|-------------|---------------|----------------|----|---------------------|-----|--------|
| HD        | 174       | Surgical | 29        | L5/S1       | Yes           | 7.0            | MD | ✓                   |     |        |
| HD        | 175       | Surgical | 37        | L5/S1       | Yes           | 8.0            | SD | ✓                   |     |        |
| HD        | 177       | Surgical | 51        | L4/L5       |               | 2.0            | N  |                     |     |        |
| HD        | 182       | Surgical | 35        | L5/S1       | Yes           | 5.0            | I  |                     |     |        |
| HD        | 184       | Surgical | 49        | L4/L5       |               | 8.0            | SD | ✓                   |     |        |
| HD        | 187       | Surgical |           |             | Yes           | 4.0            | ND |                     | ✓   | ND-/-  |
| HD        | 192       | Surgical | 29        | L5/S1       | No            | 8.0            | SD | ✓                   |     |        |
| HD        | 194       | Surgical | 35        | L4/L5       | No            | 11.0           | SD | ✓                   |     |        |
| HD        | 195       | Surgical | 38        | C6/C7       | No            | 9.0            | SD | ✓                   |     |        |
| HD        | 197       | Surgical | 42        | L4/L5       | No            | 8.0            | SD | ✓                   |     |        |
| HD        | 207       | Surgical | 38        | L5/S1       | No            | 7.0            | MD |                     | ✓   | D+/-   |
| HD        | 219       | Surgical | 54        | L5/S1       | No            | 10.5           | I  | ✓                   |     |        |
| HD        | 225       | Surgical | 36        | L5/S1       | Yes           | 9.0            | SD |                     | ✓   | D-/-   |
| HD        | 228       | Surgical |           |             |               | 6.0            | I  | ✓                   |     |        |
| HD        | 229       | Surgical | 56        | L5          | Yes           | 6.0            | MD | ✓                   |     |        |
| HD        | 231       | Surgical | 56        | L4/L5       | No            | 5.0            | MD | ✓                   | ✓   | D-/-   |
| HD        | 232       | Surgical | 58        | L5/S1       | No            | 8.0            | SD | ✓                   |     |        |
| HD        | 233       | Surgical | 44        | L5/S1       | Yes           | 9.5            | SD | ✓                   |     |        |
| HD        | 234       | Surgical | 54        | L5/S1       | Yes           | 8.5            | SD | ✓                   |     |        |
| HD        | 243       | Surgical | 28        | L4/L5       | Yes           | 6.0            | I  | ✓                   | ✓   | D+/+   |
| HD        | 245       | Surgical | 24        | L4/L5       | Yes           | 4.0            | ND |                     | ✓   | ND-/-  |
| HD        | 246       | Surgical | 40        | L5/S1       | Yes           | 7.5            | I  | ✓                   |     |        |
| HD        | 253       | Surgical | 63        | C5/C6       | Yes           | 5.0            | I  | ✓                   | ✓   | D+/-   |
| HD        | 254       | Surgical | 47        | L4/L5       | No            | 7.0            | I  | ✓                   |     |        |
| HD        | 257       | Surgical | 46        | L5/S1       | No            | 4.5            | I  | ✓                   |     |        |
| HD        | 272       | Surgical | 27        | L5/S1       | No            | 4.5            | ND |                     | ✓   | D+/-   |
| HD        | 276       | Surgical | 71        | C5/C6       |               | 6.0            | MD | ✓                   | ✓   | D-/-   |
| HD        | 281       | Surgical | 27        | L4/L5       | Yes           | 3.0            | ND | ✓                   |     |        |
| HD        | E13-00073 | PM (UT)  | 28        | L4/L5       |               | 5              | MD |                     | ✓   | D+/-   |
| HD        | 507-164   | PM (UT)  | 45        | L4/L5       |               | 5              | MD |                     | ✓   | D-/-   |
| HD        | 507-001   | PM (UT)  | 80        | L4/L5       |               | 6              | MD |                     | ✓   | D+/-   |
| HD        | 507-234   | PM (UT)  | 80        | L4/L5       |               | 6              | MD |                     | ✓   | D+/-   |

(Continued)

| Reference | Source  | Age     | IVD Level | IVD Intact? | Average Grade | Classification | DE | Cytokine Treatments | IHC | Cohort |
|-----------|---------|---------|-----------|-------------|---------------|----------------|----|---------------------|-----|--------|
| <b>HD</b> | 506-219 | PM (UT) | 54        | L4/L5       |               | 7              | MD |                     | ✓   | D-/-   |
| <b>HD</b> | 506-145 | PM (UT) | 59        | L4/L5       |               | 7              | MD |                     | ✓   | D+/-   |
| <b>HD</b> | 507-110 | PM (UT) | 63        | L4/L5       |               | 8              | SD |                     | ✓   | D+/-   |
| <b>HD</b> | 506-290 | PM (UT) | 88        | L4/L5       |               | 9              | SD |                     | ✓   | D+/-   |
| <b>HD</b> | 506-136 | PM (UT) | 75        | L4/L5       |               | 9              | SD |                     | ✓   | D+/+   |
| <b>HD</b> | 508-070 | PM (UT) | 21        | L4/L5       |               | 9              | SD |                     | ✓   | D+/-   |
| <b>HD</b> | 504-134 | PM (UT) | -         | L4/L5       |               | 9              | SD |                     | ✓   | D+/+   |
| <b>HD</b> | 506-272 | PM (UT) | 68        | L4/L5       |               | 10             | SD |                     | ✓   | D+/-   |
| <b>HD</b> | 507-051 | PM (UT) | 82        | L4/L5       |               | 10             | SD |                     | ✓   | D+/+   |
| <b>HD</b> | 508-263 | PM (UT) | 28        | L4/L5       |               | 11             | SD |                     | ✓   | D+/-   |
| <b>HD</b> | 506-191 | PM (UT) | 67        | L4/L5       |               | 11             | SD |                     | ✓   | D-/-   |
| <b>HD</b> | 507-192 | PM (UT) | 63        | L4/L5       |               | 11             | SD |                     | ✓   | D+/+   |
| <b>HD</b> | 506-179 | PM (UT) | 59        | L4/L5       |               | 11             | SD |                     | ✓   | D+/+   |
| <b>HD</b> | 507-066 | PM (UT) | 80        | L4/L5       |               | 12             | SD |                     | ✓   | D+/-   |

**Supplementary Table 2: Target antibodies used for IHC, their optimal concentrations and antigen retrieval methods.** Heat antigen retrieval consisted of 10 minute microwave irradiation in 0.05 M Tris buffer, pH 9.5 pre-heated to 60°C. Enzyme antigen retrieval consisted of incubation of tissue in 0.01% w/v chymotrypsin/CaCl<sub>2</sub> (Sigma, UK), for 30 minutes at 37°C

| Target Antibody             | Clonality         | Optimal Dilution | Antigen Retrieval Method | Secondary Antibody | Serum Block |
|-----------------------------|-------------------|------------------|--------------------------|--------------------|-------------|
| <b>NF200 (ab82259)</b>      | Mouse Monoclonal  | 1/400            | Heat                     | Rabbit anti mouse  | Rabbit      |
| <b>PGP9.5 (ab8189)</b>      | Mouse Monoclonal  | 1/200            | Heat                     | Rabbit anti mouse  | Rabbit      |
| <b>CD31 (ab28364)</b>       | Rabbit Polyclonal | 1/400            | Enzyme                   | Goat anti Rabbit   | Goat        |
| <b>Sema3C (ab135842)</b>    | Rabbit Polyclonal | 1/200            | None                     | Goat anti Rabbit   | Goat        |
| <b>Sema3D (ABIN1386639)</b> | Rabbit Polyclonal | 1/200            | Enzyme                   | Goat anti Rabbit   | Goat        |
| <b>NRP-1 (ab81321)</b>      | Rabbit Monoclonal | 1/200            | Heat                     | Goat anti Rabbit   | Goat        |
| <b>NRP-2 (ab185710)</b>     | Rabbit Polyclonal | 1/200            | Enzyme                   | Goat anti Rabbit   | Goat        |
| <b>Plexin A1 (ab32960)</b>  | Rabbit Polyclonal | 1/200            | Enzyme                   | Goat anti Rabbit   | Goat        |
